# Supplementary material for: Discorhabdin N, a South African Natural Compound, for Hsp72 and Hsc70 Allosteric Modulation: Combined Study of Molecular Modeling and Dynamic Residue Network Analysis
Source: MDPI journal article supplement (doi:10.3390/molecules24010188), 2019-01-06
Supplement: s1 [file s1]

*Supplementary Material*

**Discorhabdin N, a South African natural  
compound, for Hsp72 and Hsc70 allosteric  
modulation: Combined study of molecular  
modeling and dynamic residue network  
analysis**

**Arnold Amusengeri<sup>1a</sup> and Özlem Tastan Bishop<sup>1b\*</sup>**

<sup>1</sup>Research Unit in Bioinformatics (RUBi), Department of Biochemistry and Microbiology,  
Rhodes University, Grahamstown, 6140, South Africa

**\* Correspondence:**

Özlem Tastan Bishop  
email: O.TastanBishop@ru.ac.za

13 **Table S1: Structure validation results:** Tabulated summary of Z-dope, Ramachandran,  
 14 ProSA and Verify-3D results.

15

| Protein | Z-Dope score | PROCHECK (Ramachandran Plot)                             |                                                                    |                                                                    |                                                            | ProSA Z-Score | Verify 3D |         |
|---------|--------------|----------------------------------------------------------|--------------------------------------------------------------------|--------------------------------------------------------------------|------------------------------------------------------------|---------------|-----------|---------|
|         |              | Number of residues in favoured region (Percentage value) | Number of residues in additional allowed region (Percentage value) | Number of residues in generously allowed region (Percentage value) | Number of residues in disallowed region (Percentage value) |               | Score     | Comment |
| Hsp72   | -0.51        | 93.70%                                                   | 5.20%                                                              | 0.70%                                                              | 0.40%                                                      | -10.98        | 85.81%    | Pass    |
| Hsc70   | -0.56        | 94.10%                                                   | 4.80%                                                              | 0.50%                                                              | 0.50%                                                      | -11.07        | 83.99%    | Pass    |

16

## Hsp72

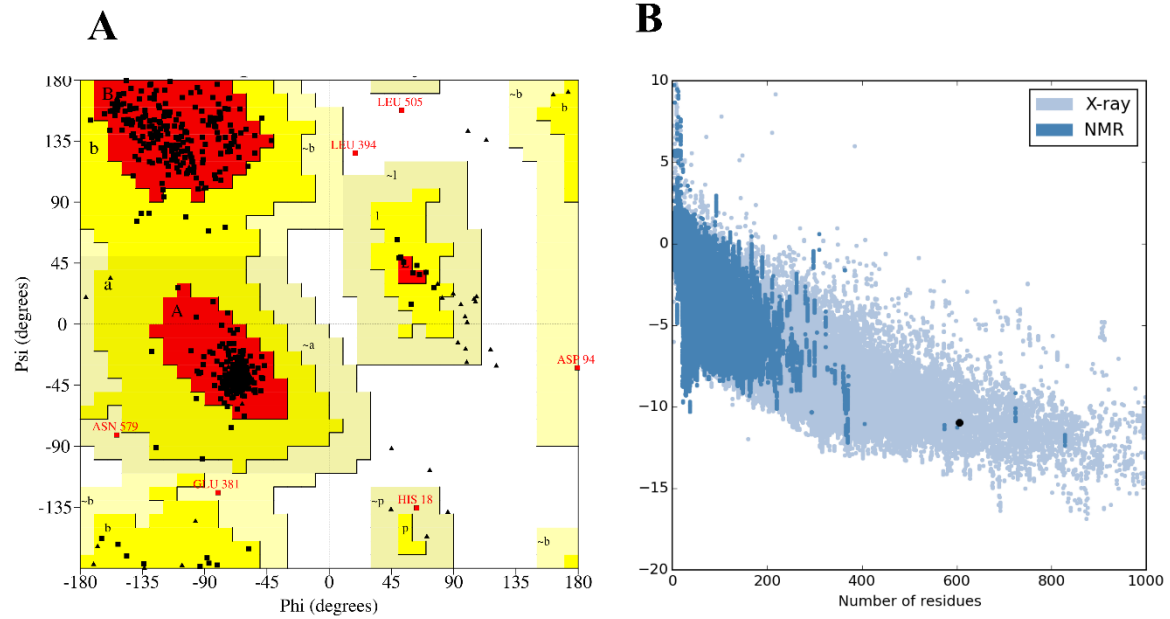

## Hsc70

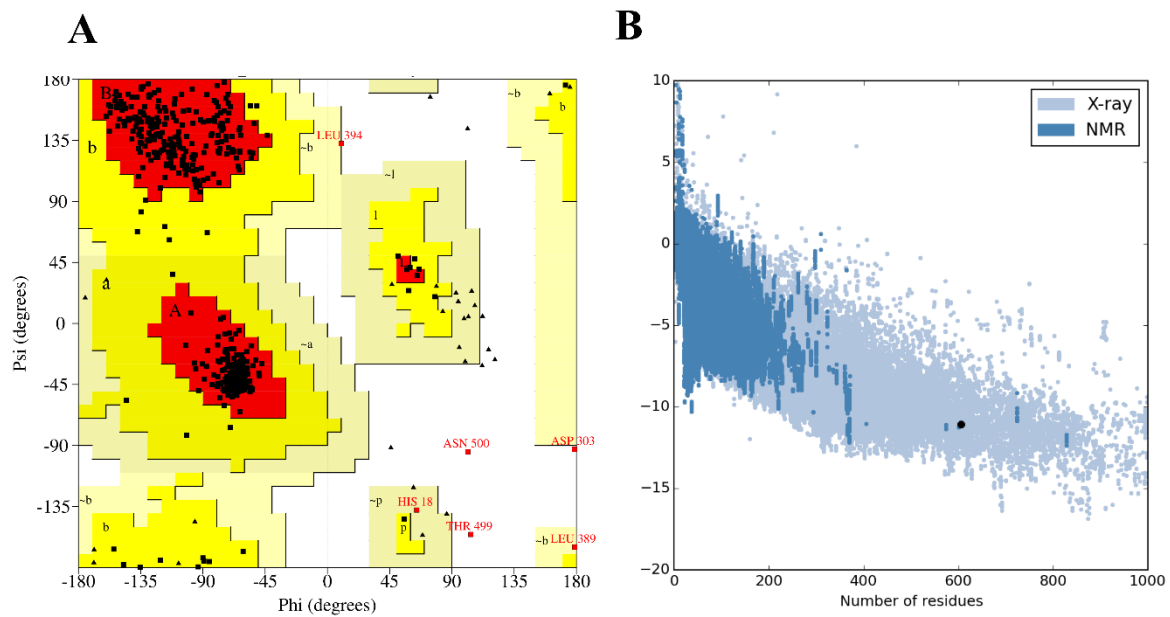

17

18 **Figure S1: Model validation summary. (A) Ramachandran plots.** In both proteins, more  
 19 than 90% of all residues occupied the most favoured region (Hsp72: 93.70%, Hsc70:  
 20 94.10%). **(B) ProSA results.** Both proteins recorded low Z-Score values (Hsp72: -10.98,  
 21 Hsc70: -11.07) that were within the range of high resolution crystallized proteins.

# Hsp72

A

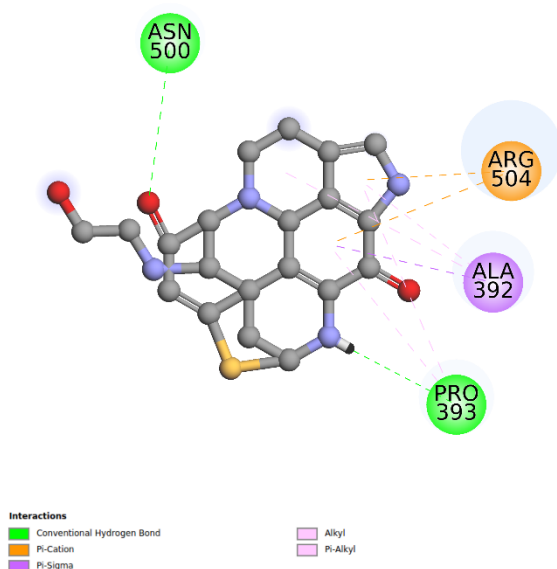

B

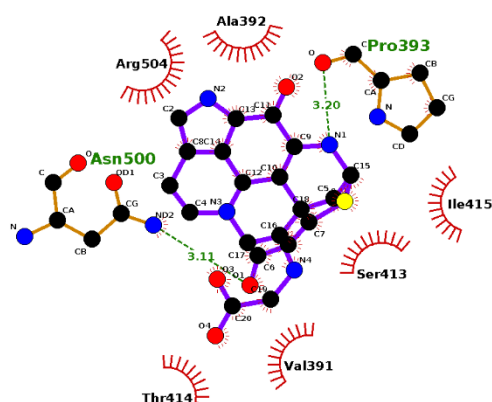

Hsp72\_SANC00132

# Hsc70

A

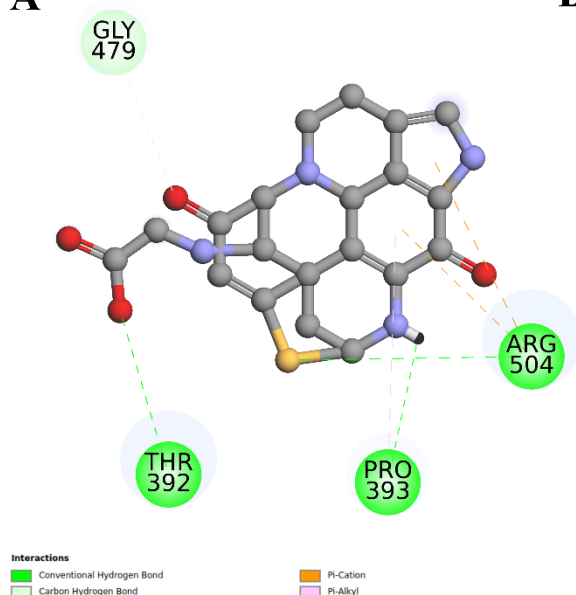

B

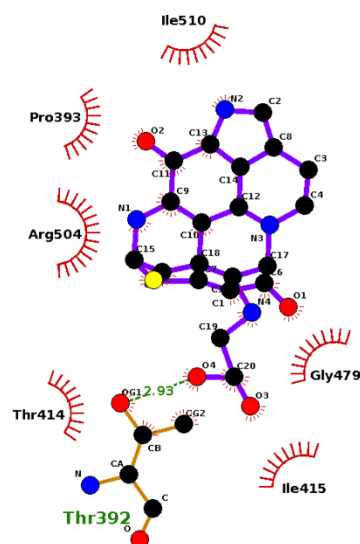

Hsc70-SANC00132

22

23 **Figure S2: Molecular docking interactions visualised using (A) Discovery studio**  
 24 **visualizer, and (B) LigPlot+.** (A) SANC00132 is displayed in ball and stick while non-  
 25 bonded interactions are shown as dashed lines. (B) SANC00132 is represented in ball and  
 26 stick while bonds are shown sticks (purple solid lines). Hydrogen bonds are shown as dashed  
 27 green lines while protein residues making hydrogen bond connections are represented in ball  
 28 and stick.

29 **Table S2: Tabulated results from Vina and XScore scoring tools.**

30

| Compound  | Molecular weight (g/mol) | Protein | Vina                  |      | X-Score       |               |               |               |      |
|-----------|--------------------------|---------|-----------------------|------|---------------|---------------|---------------|---------------|------|
|           |                          |         | Vina Score (Kcal/mol) | Rank | HPScore (pKd) | HMScore (pKd) | HSScore (pKd) | Average (pKd) | Rank |
| SANC00132 | 396.30                   | Hsp72   | -6.9                  | 7    | 5.56          | 5.48          | 5.48          | 5.51          | 14   |
|           |                          | Hsc70   | -7.1                  | 11   | 5.78          | 5.91          | 5.53          | 5.74          | 5    |

31

**Table S3: Post-docking analysis results.** Tabulated results of (A) Hsp72 and (B) Hsc70 residues interacting with SANC00132.

(A)

| Hsp72                                       |                                    |
|---------------------------------------------|------------------------------------|
| Hsp72 interacting residues (DNAK numbering) | Hsp72 complete sequence equivalent |
| ALA392                                      | ALA397                             |
| PRO393                                      | PRO398                             |
| ASN500                                      | ASN505                             |
| ARG504                                      | ARG509                             |

(B)

| Hsc70                                       |                                    |
|---------------------------------------------|------------------------------------|
| Hsc70 interacting residues (DNAK numbering) | Hsc70 complete sequence equivalent |
| THR392                                      | THR397                             |
| PRO393                                      | PRO398                             |
| GLY479                                      | GLY484                             |
| ARG504                                      | ARG509                             |

**Table S4: Results of computed molecular descriptors using FAF-Drugs4 web-server.**

SANC00132 passed the Lipinski tests for drug likeness (RO5) including Molecular mass < 500 Dalton: MW = 410.45, Lipophilicity (LogP) < 5: logP = -2.36, Hydrogen bond donors < 5: HBD = 4, and Hydrogen bond acceptors < 10: HBA = 8.

| Ligand                     | SANC00132       |
|----------------------------|-----------------|
| MW                         | 410.45          |
| logP                       | -2.36           |
| logD                       | -3.76           |
| logSw                      | -0.78           |
| tPSA                       | 147.24          |
| RotatableB                 | 3               |
| RigidB                     | 31              |
| Flexibility                | 0.09            |
| HBD                        | 4               |
| HBA                        | 8               |
| HBD_HBA                    | 12              |
| Rings                      | 1               |
| MaxSizeRing                | 24              |
| NumCharges                 | 2               |
| TotalCharge                | 0               |
| HeavyAtoms                 | 29              |
| CarbonAtoms                | 20              |
| HeteroAtoms                | 9               |
| ratioH/C                   | 0.45            |
| Lipinski_Violation         | 0               |
| Solubility(mg/l)           | 188397.59       |
| SolubilityForecastIndex    | Good Solubility |
| Oral_Bioavailability_VEBER | Good            |
| Oral_Bioavailability_EGAN  | Good            |
| TrafficLights              | 3               |
| 4_400                      | good            |
| 3_75                       | good            |
| Phospholipidosis           | NonInducer      |
| Fsp3                       | 0.45            |
| StereoCenters              | 5               |
| PAINS_Filter_A             | 0               |
| PAINS_Filter_B             | 0               |
| PAINS_Filter_C             | 0               |
| Result                     | Accepted        |

45 **Table S5:** Tabulated RMSD convergence values

46

| Protein                 |      | RMSD convergence value |
|-------------------------|------|------------------------|
| Hsp72 apo run1          | Run1 | ~1.5 nm                |
|                         | Run2 | ~1.2 nm                |
| Hsp72 endo-apo          | Run1 | ~1.2 nm                |
|                         | Run2 | ~1.9 nm                |
| Hsc70 apo               | Run1 | ~1.5 nm                |
|                         | Run2 | ~1.7 nm                |
| Hsc70 endo-apo          | Run1 | ~1.6 nm                |
|                         | Run2 | ~1.3 nm                |
| Hsp72-SANC00132 complex | Run1 | ~1.5 nm                |
|                         | Run2 | ~1.5 nm                |
| Hsp72 endo-complex      | Run1 | ~0.7 nm                |
|                         | Run2 | ~1.5 nm                |
| Hsc70-SANC00132 complex | Run1 | ~1.2 nm                |
|                         | Run2 | ~1.2 nm                |
| Hsc70 endo-complex      | Run1 | ~1.5 nm                |
|                         | Run2 | ~1.5 nm                |

47



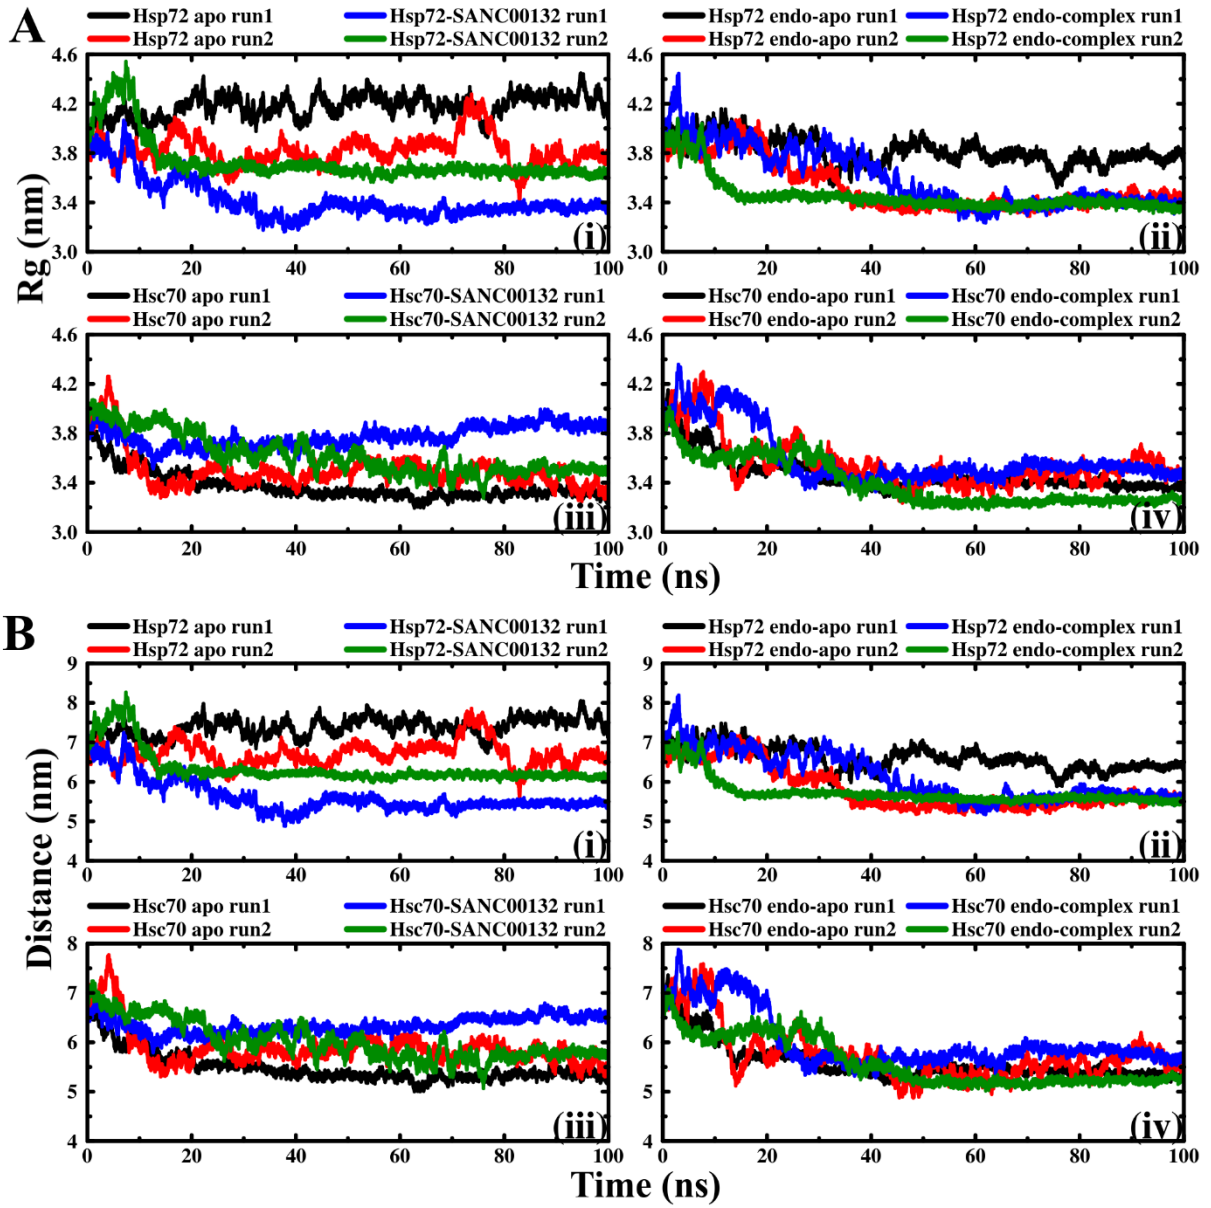

**Figure S3: (A) Time dependent radius of gyration (Rg) of Hsp72 and Hsc70 during 100ns simulation. (i) Hsp72 Set1, (ii) Hsp72 Set2, (iii) Hsc70 Set1, (iv) Hsc70 Set2. (B) Time-dependent distance between the centre of mass of the NBD and that of the SBD. (i) Hsp72 Set1, (ii) Hsp72 Set2, (iii) Hsc70 Set1, (iv) Hsc70 Set2. Colour code: Black and red: inhibitor-free, Blue and green: inhibitor-bound.**

**Table S6: Tabulated values of the percentage variance contributed by the first two principal components. Also displayed are respective trace values of diagonalized covariance matrices of each MD trajectory.**

| Protein systems         |      | Percentage variance accounted by each component |         | Trace value / cumulative sum of eigenvalues (nm <sup>2</sup> ) | Trace value variance between Run1 and Run2                             |
|-------------------------|------|-------------------------------------------------|---------|----------------------------------------------------------------|------------------------------------------------------------------------|
|                         |      | PC1 (%)                                         | PC2 (%) |                                                                |                                                                        |
| Hsp72 apo               | Run1 | 54.10                                           | 24.96   | 520.860                                                        | 3854.51                                                                |
|                         | Run2 | 55.12                                           | 27.31   | 433.059                                                        |                                                                        |
| Hsp72-SANC00132 complex | Run1 | 57.54                                           | 24.03   | 263.135                                                        | 353.89                                                                 |
|                         | Run2 | 63.10                                           | 16.64   | 236.531                                                        |                                                                        |
| Hsp72 endo-apo          | Run1 | 46.01                                           | 23.76   | 247.669                                                        | 15335.08                                                               |
|                         | Run2 | 70.88                                           | 19.48   | 422.798                                                        |                                                                        |
| Hsp72 endo-complex      | Run1 | 70.06                                           | 18.35   | 635.812                                                        | 1522120.50                                                             |
|                         | Run2 | 62.00                                           | 13.95   | 84.2316                                                        |                                                                        |
| Hsc70 apo               | Run1 | 71.04                                           | 8.80    | 99.7293                                                        | 5550.44                                                                |
|                         | Run2 | 48.94                                           | 29.23   | 205.09                                                         |                                                                        |
| Hsc70-SANC00132 complex | Run1 | 47.79                                           | 21.59   | 129.313                                                        | 4895.25                                                                |
|                         | Run2 | 58.47                                           | 26.04   | 228.26                                                         |                                                                        |
| Hsc70 endo-apo          | Run1 | 59.96                                           | 27.82   | 209.165                                                        | 65.38                                                                  |
|                         | Run2 | 42.19                                           | 22.91   | 197.73                                                         |                                                                        |
| Hsc70 endo-complex      | Run1 | 78.62                                           | 9.45    | 350.493                                                        | 37.27                                                                  |
|                         | Run2 | 75.85                                           | 13.66   | 341.859                                                        |                                                                        |
|                         |      |                                                 |         |                                                                | Total variance =182212.3                                               |
|                         |      |                                                 |         |                                                                | Average standard deviation ( $\sqrt{\text{Total variance}}$ ) = 426.86 |

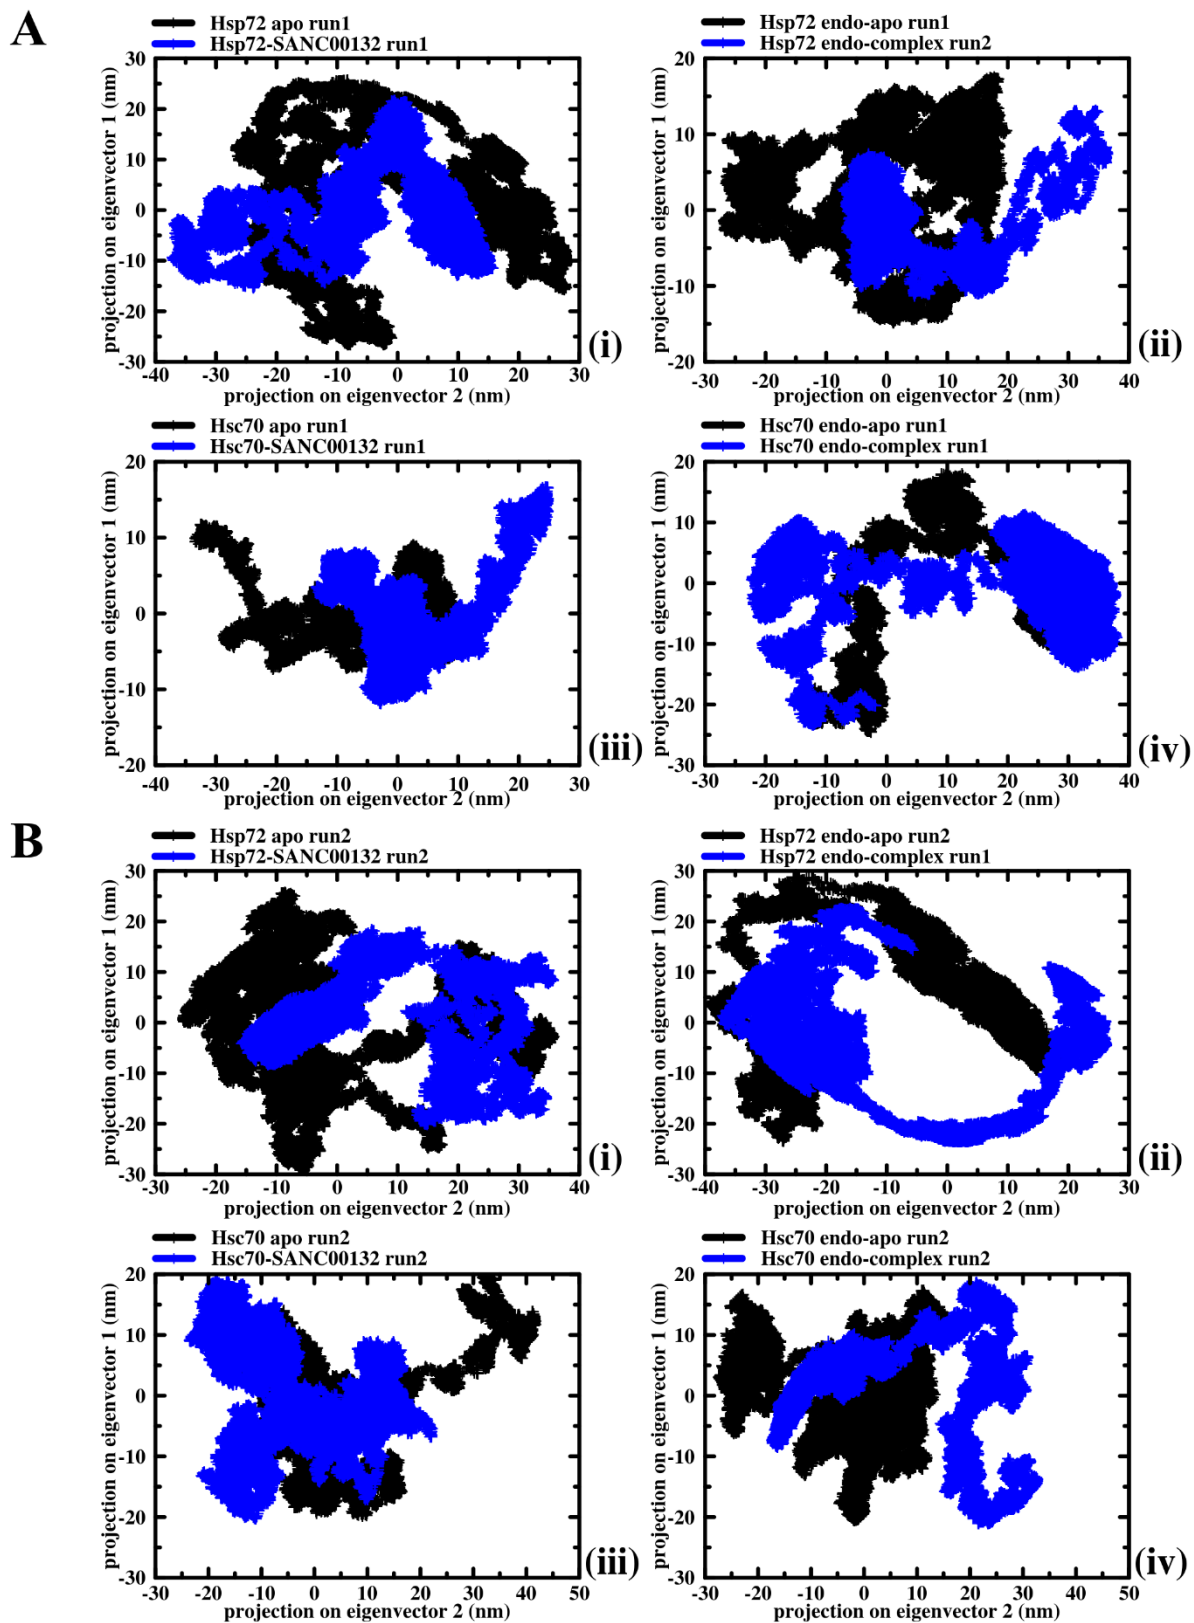

**Figure S4: 2D projection of first and second principal components. Colour key: Black: inhibitor-free, Blue: inhibitor-bound. A: Initial simulations, B: Duplicate simulations.**

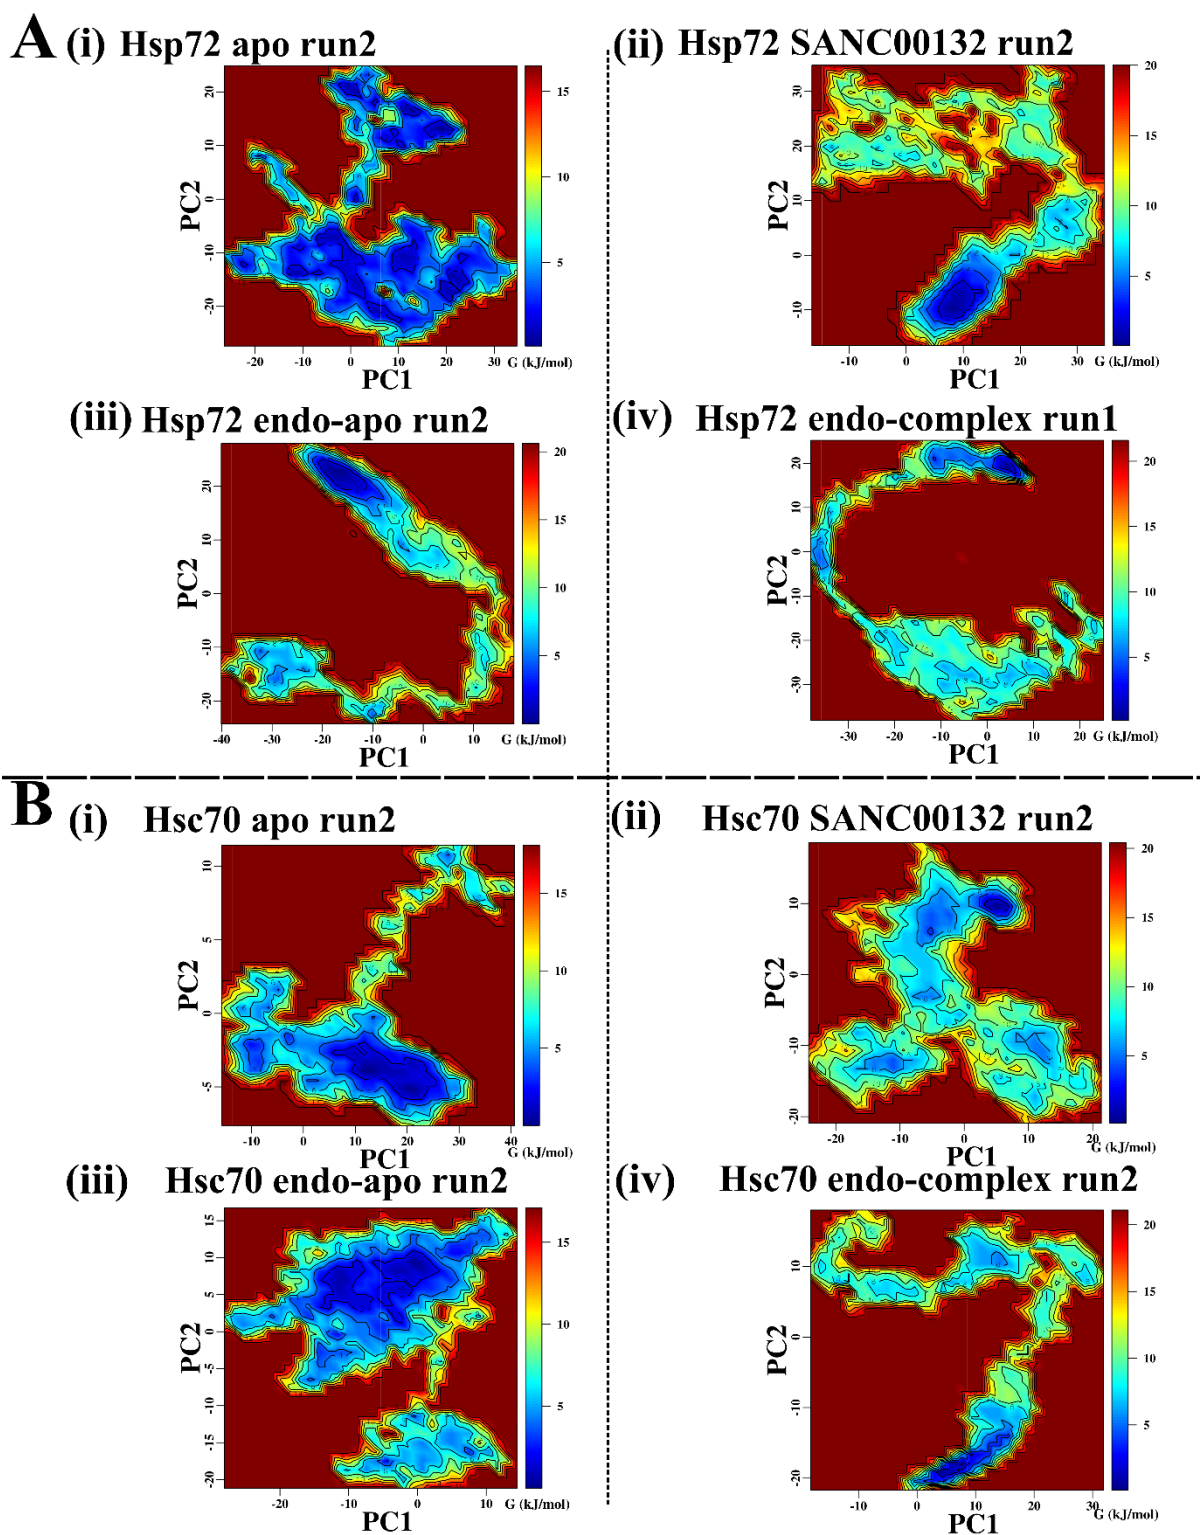

**Figure S5: Free energy landscape projections along the first and second principal components.** **A:** Hsp72: (i) Hsp72 apo Run2, (ii) Hsp72-SANC00132 Run2, (iii) Hsp72 endo-apo Run2 (iv) Hsp72 endo-complex Run1. **B:** Hsc70: (i) Hsc70 apo Run2, (ii) Hsc70-SANC00132 Run2, (iii) Hsc70 endo-apo Run2 (iv) Hsc70 endo-complex Run2.

**Table S7: Per residue contribution to the total binding free energy.** Residues contributing > +/-5 kJmol<sup>-1</sup> of the total binding free energy were summarised below.

| Protein-ligand complex  |      | Per residue contribution to total BFE                                                  |                                                                                                | Standard deviation |
|-------------------------|------|----------------------------------------------------------------------------------------|------------------------------------------------------------------------------------------------|--------------------|
|                         |      | Residue                                                                                | Binding energy (kJmol <sup>-1</sup> )                                                          |                    |
| Hsp72-SANC00132 complex | Run1 | ALA392<br>PRO393<br>ILE415<br>GLU439<br>ARG504                                         | -9.2929<br>-5.6193<br>-8.5837<br>9.6769<br>-5.7884                                             | 0.8923083          |
|                         | Run2 | VAL391<br>LEU396<br>ILE415<br>GLU439<br>ILE475                                         | -5.2542<br>-11.3954<br>-8.3079<br>-5.9290<br>-5.8271                                           | 0.8634035          |
| Hsp72 endo-complex      | Run1 | ALA392<br>ILE415                                                                       | -7.0066<br>-9.7801                                                                             |                    |
|                         | Run2 | ARG166<br>ASP390<br>VAL391<br>ALA392<br>LEU394<br>LEU396<br>THR414<br>GLU439<br>LEU481 | 7.0044<br>10.5007<br>-6.7432<br>-6.6763<br>-6.2393<br>-10.4549<br>-5.7496<br>6.9388<br>-6.0443 | 1.041394           |
| Hsc70-SANC00132 complex | Run1 | Val391<br>ASP501<br>ARG504<br>LYS507                                                   | -8.4813<br>-6.7608<br>10.7052<br>14.0571                                                       | 0.977574           |
|                         | Run2 | PRO393<br>ILE415                                                                       | -9.4854<br>-7.7102                                                                             | 0.6952183          |
| Hsc70 endo-complex run1 | Run1 | HIS18<br>GLY19<br>LEU386<br>VAL391<br>GLU439<br>GLY479<br>ARG504                       | -8.9954<br>-5.0711<br>-5.1133<br>-11.1632<br>-5.1557<br>-5.4216<br>9.8270                      | 0.9081865          |
|                         | Run2 | THR392<br>GLY479<br>ARG504<br>GLU439                                                   | -10.0733<br>-6.1143<br>-9.7011<br>9.2959                                                       | 0.8594879          |

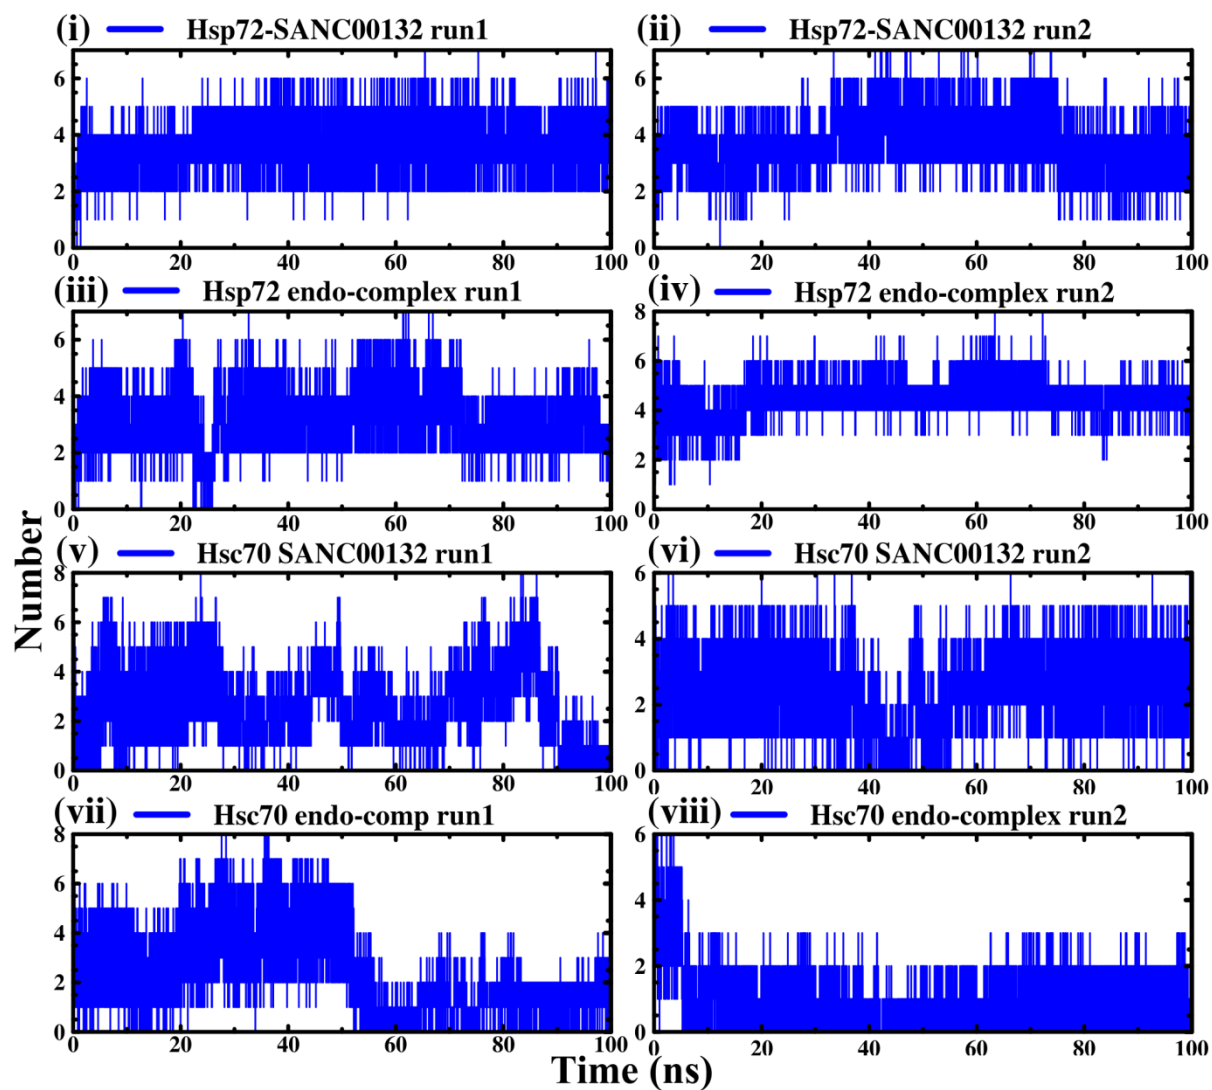

**Figure S6: Plots showing the number of hydrogen bonds formed between protein-ligand complexes throughout the simulation period.**

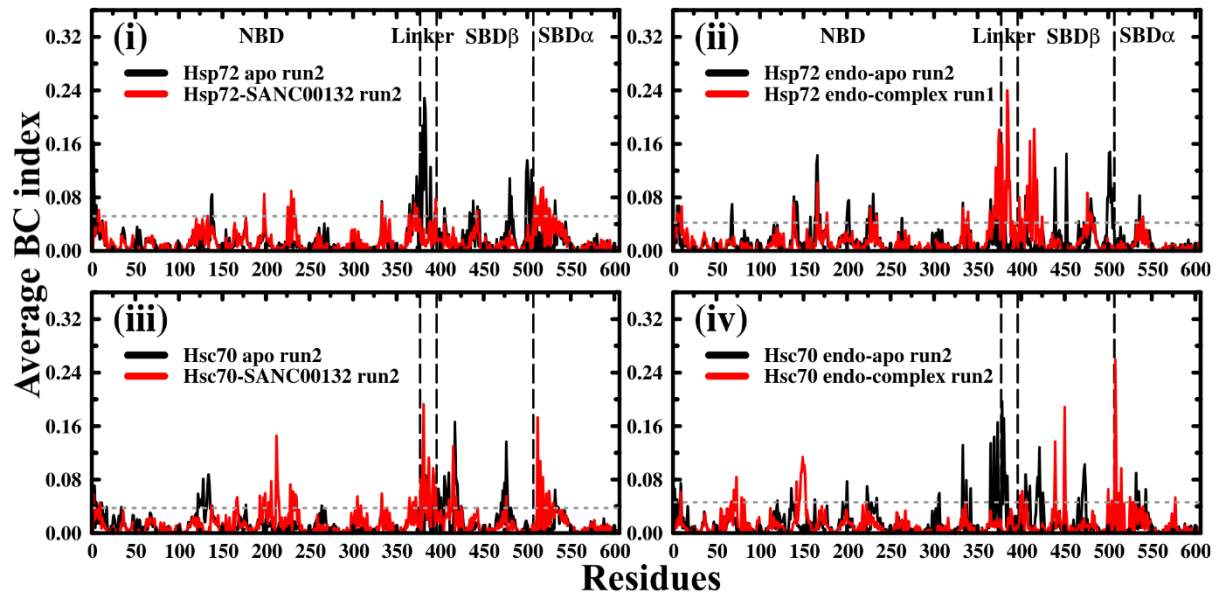

**Figure S7: Contact network analysis: Betweenness centrality results for duplicate simulations.** The lower threshold values of 0.05 (Hsp72 apo run2), 0.04 (Hsp72 endo-apo run2), 0.04 (Hsc70 apo run2), and 0.05 (Hsc70 endo-apo run2) are indicated by the dotted grey lines.

**Table S8: Tabulated summary of residues having low average (L) values.** Equivalent residue numbering from complete Hsp72 and Hsc70 sequences (accession numbers NP\_005337.2 and AAK17898.1 respectively). **(A and B)** Inhibitor free and inhibitor-bound protein residues translated from **Table 1**.

**(A) Inhibitor-free proteins**

| Protein | Residues                                                                                                                                                                                                           |
|---------|--------------------------------------------------------------------------------------------------------------------------------------------------------------------------------------------------------------------|
| Hsp72   | ALA6-THR14, CYY17 - GLN19, GLU27 – ILE29, TYR41, ARG72, LEU124, THR125, GLU132, THR140, ALA142-TYR149, GLN156, LYS159, ASP160, VAL163, ASN168-LEU185, PHE198-LEU200, LEU336, GLY338, ASN364, ASP366, ALA368-GLN389 |
| Hsc70   | ALA6-GLN22, GLU27, ILE29, ALA30, PRO39, TYR41, ARG72, GLY75, SER121, MET122, LEU124, THR125, MET127-GLU129, ALA131, GLU132, THR140-ASN151, LYS159-THR163, GLY166-TYR183, GLY338, ALA368-GLY382, GLN389             |

**(B) Inhibitor-bound proteins**

| Protein | Residues                                                                                                                                                                                                                                                                                |
|---------|-----------------------------------------------------------------------------------------------------------------------------------------------------------------------------------------------------------------------------------------------------------------------------------------|
| Hsp72   | GLY8-THR13, CYS17-VAL20, GLU25, ILE29, VAL133-TYR149, ILE172-ARG187, LEU196-LEU200, ILE209-THR211, GLU218, LEU334-GLY339, ARG342, LYS361, ASN364-ILE379, MET381, ASP395, ILE420-LYS423, ASP481, ASN483-ILE485                                                                           |
| Hsc70   | ALA6-THR14, CYS17-PHE21, ILE29, TYR41, LYS71, ARG72, ARG76, SER121, LEU124, THR125, LYS128, GLU129, GLU132, ALA142-TYR149, ASN151, ARG155, GLU156, LYS159, ASP160, GLY162, THR163, GLY166, ASN168-TYR183, PHE198, LEU200, ILE209, THR211, LYS221, ALA368-ILE379, SER381, GLY382, LEU391 |



**Table S9: Residues that yielded high betweenness values: Corresponding residue numbering from complete Hsp72 and Hsc70 sequences (accession numbers NP\_005337.2 and AAK17898.1 respectively). (A and B) Residues from inhibitor-free proteins and inhibitor-bound proteins translated from Table 3.**

**(A) Inhibitor-free proteins**

| Protein | Residues                                                                                                                                                                                                                                                                                                                                                                                                                                                                                                                                                                                                                  |
|---------|---------------------------------------------------------------------------------------------------------------------------------------------------------------------------------------------------------------------------------------------------------------------------------------------------------------------------------------------------------------------------------------------------------------------------------------------------------------------------------------------------------------------------------------------------------------------------------------------------------------------------|
| Hsp72   | ILE7, ASP10, GLY12, VAL143, ILE144, LEU170, ARG171, ASN174, ALA182, ASP206, GLU231, ASN235, ASN239, GLY338, ARG342, ALA370, ALA374, ALA377-ILE379, SER381-ASP395, LEU399, SER400, THR410, THR411, TYR443, GLU444, GLU446, ALA448, GLY457, ILE485, ASN487, THR489, THR504-LYS507, ARG509-LEU510, GLU516, SER537, ASN540, ALA541                                                                                                                                                                                                                                                                                            |
| Hsc70   | VAL7, GLY8, ASP10-GLY12, THR14, CYS17, TYR41, LYS88, TRP90, LYS102, PRO116, SER121, LEU124, THR125, MET127, LYS128, ALA133, VAL139, ASN141, VAL143-VAL146, ILE164, ASN174, PRO176, ALA182, LYS188, LEU200, PHE205, LEU228, ASP234, ASN235, ASN239, ALA270, GLY338, ARG342, GLN347, VAL369, ALA370, ALA374, GLN376-ALA378, ASP383, SER385-GLU386, VAL388-LEU392, ILE403, GLU404, ALA406, MET410-VAL412, ILE414, LYS415, THR422-GLN426, THR429, THR430, MET449, GLY459, GLY470, VAL471, GLU475, THR477-ASP479, ASP481, ALA482, LEU486-SER489, THR504-ASP506, ARG509, SER542, ASN540, SER541, TYR545, ASN548, MET549, ASP582 |

**(B) Inhibitor-bound proteins**

| Protein | Residues                                                                                                                                                                                                                                                                                                                                                                                                                                                                                                                                                                                                                              |
|---------|---------------------------------------------------------------------------------------------------------------------------------------------------------------------------------------------------------------------------------------------------------------------------------------------------------------------------------------------------------------------------------------------------------------------------------------------------------------------------------------------------------------------------------------------------------------------------------------------------------------------------------------|
| Hsp72   | ASP10-CYS17, LEU124, THR125, GLU132, VAL143, ILE144, VAL146, ARG171, ASN174, ALA179-TYR183, LEU196, GLY203, GLU231, ASP234, ASN235, VAL238, ASN239, LEU336, GLY338, ARG342, PRO344, GLN347, VAL369, ALA370, GLY372, ALA374 - LEU380, GLY382, ASP383, ASN387, GLN389-LEU392, ASP395, SER400, LEU403, ALA406, MET410-LEU413, LYS415, THR419-PRO421, LYS423, THR429, THR429, GLN441, ALA448, THR479, ASP481, GLY484, ILE485, LEU486, VAL488, THR489, THR504, ASP506, LYS512, GLU516, GLN520, GLU523, ALA527, SER537, ALA538, ALA541, LEU542, TYR545, MET549                                                                              |
| Hsc70   | ASP10, GLY12, THR14, TYR15, VAL18, GLU27 - ILE29, ARG72, ARG76, LEU124, THR125, VAL143 - PRO147, PHE150, GLN154 - GLN156, ASN168, VAL169, ARG171, ASN174, PRO176, LEU200, GLY202, THR204, ASP206, THR211, PHE217, GLU218, GLY229, PHE233, ARG236, ASN239, PHE310, GLY338, ARG342, VAL369, ALA370, GLY372, ALA374, ALA377, ASP383, GLU386, VAL388, ASP390, LEU391, LEU392, ASP395 - PRO398, SER400, ILE403, GLU404, ALA406, MET410 - VAL412, LYS415, THR419 - PRO421, GLN441, GLU444, ALA448, LEU455, ASN487, ASN505, LYS507, SER511 - ASP514, GLU516, ARG517, GLN520, GLU523, GLU530, SER537, SER538, ASN540 - TYR545, MET549, ASP582 |

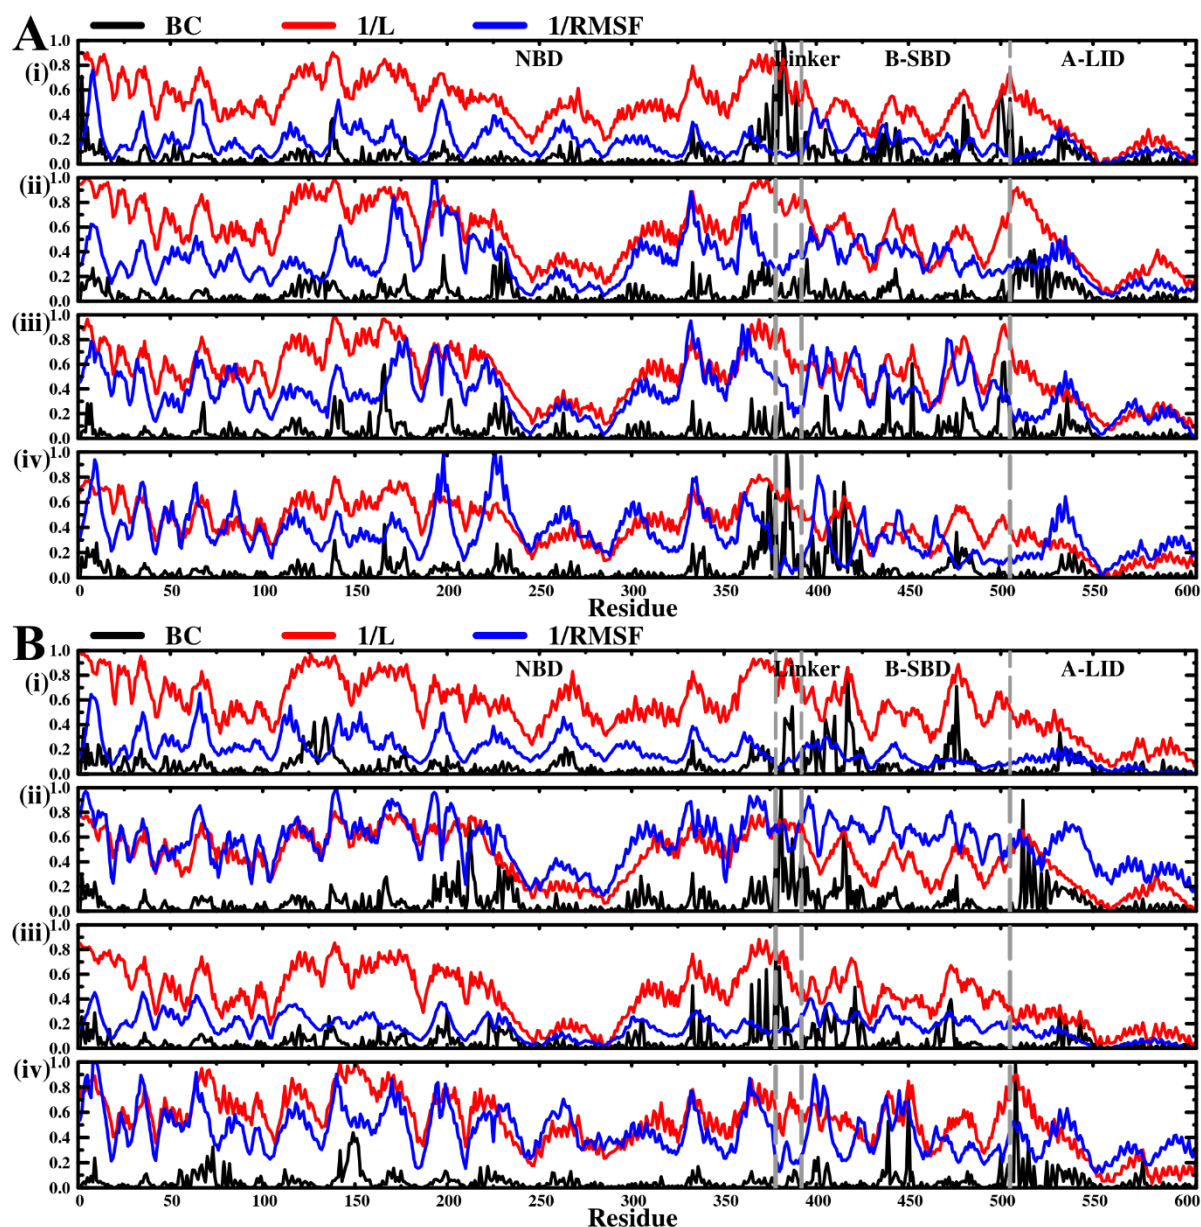

98

99 **Figure S8: A graphical illustration of correlation between BC, 1/L and 1/RMSF of**  
 100 **duplicate simulation results. A:** (i) Hsp72 apo run2, (ii) Hsp72-SANC00132 complex run2,  
 101 (iii) Hsp72 endo-apo run2, (iv) Hsp72 endo-complex run1, **B:** (i) Hsc70 apo run2, (ii) Hsc70-  
 102 SANC00132 complex run2, (iii) Hsc70 endo-apo run2, (iv) Hsc70 endo-complex run2.

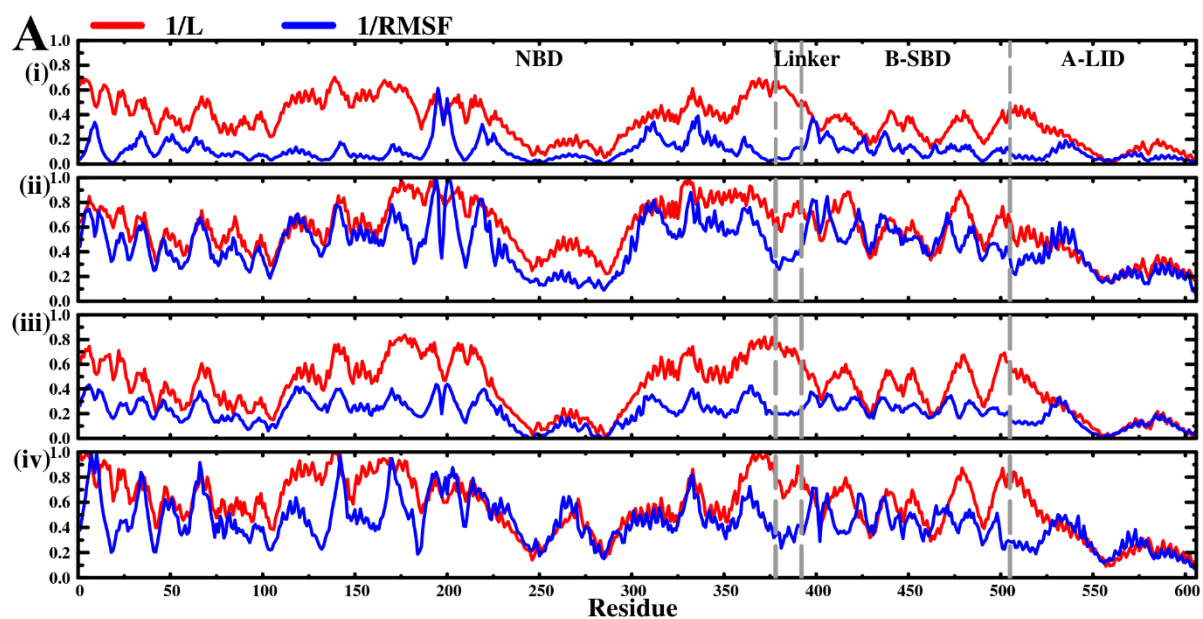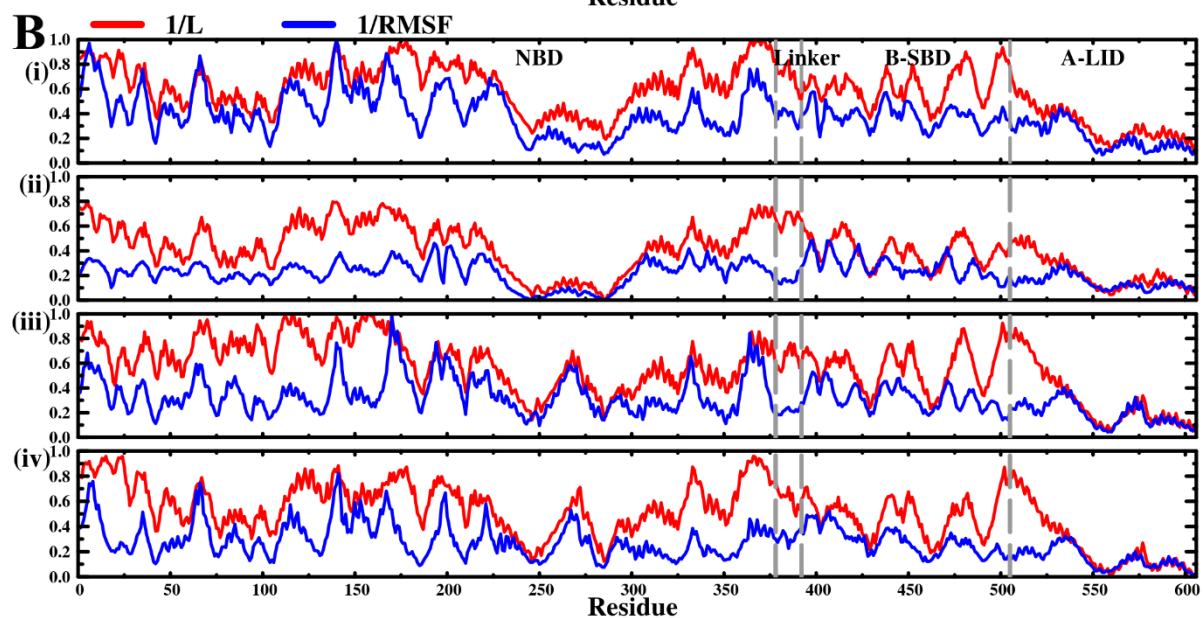

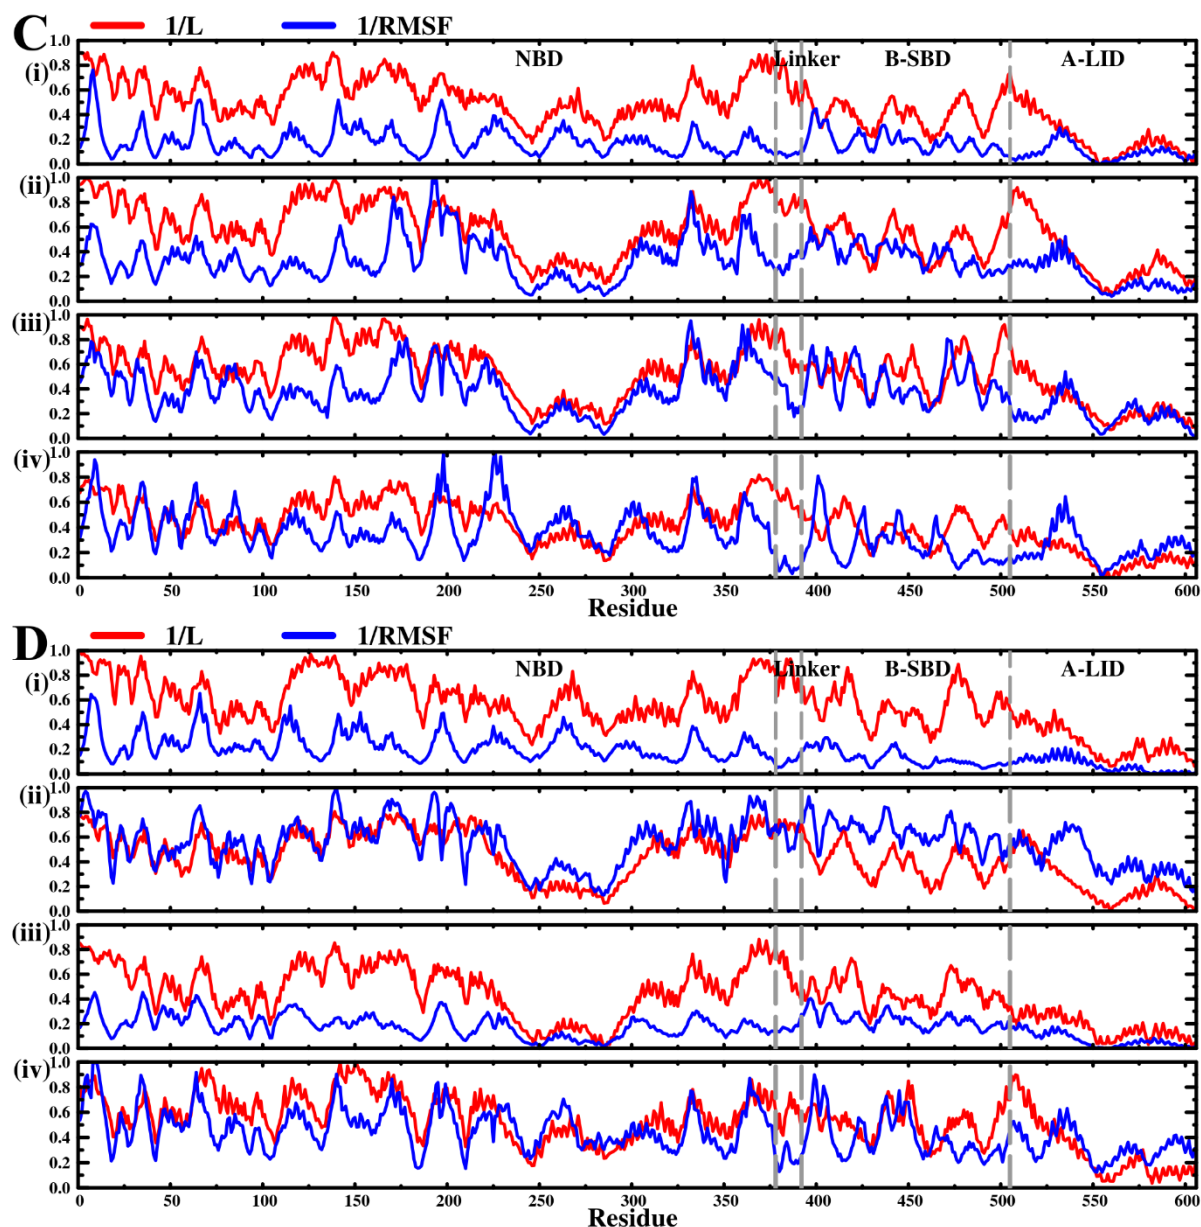

**Figure S9: Pairwise comparison of correlation between  $1/L$  and  $1/RMSF$ :** A: (i) Hsp72 apo run1, (ii) Hsp72-SANC00132 complex run1, (iii) Hsp72 endo-apo run1, (iv) Hsp72 endo-complex run2, B: (i) Hsc70 apo run1, (ii) Hsc70-SANC00132 complex run1, (iii) Hsc70 endo-apo run1, (iv) Hsc70 endo-complex run1. C: (i) Hsp72 apo run2, (ii) Hsp72-SANC00132 complex run2, (iii) Hsp72 endo-apo run2, (iv) Hsp72 endo-complex run1, D: (i) Hsc70 apo run2, (ii) Hsc70-SANC00132 complex run2, (iii) Hsc70 endo-apo run2, (iv) Hsc70 endo-complex run2.

| Protein                 | NBD (Nucleotide Binding Domain) |                       |                       |                                  |                                      | SBD (Substrate Binding Domain) |                       |                       |                                  |                                      |
|-------------------------|---------------------------------|-----------------------|-----------------------|----------------------------------|--------------------------------------|--------------------------------|-----------------------|-----------------------|----------------------------------|--------------------------------------|
|                         | L vs RMSF (100ns)               | L vs RMSF (last 15ns) | L <sup>-1</sup> vs BC | RMSF <sup>-1</sup> (100ns) vs BC | RMSF <sup>-1</sup> (last 15ns) vs BC | L vs RMSF (100ns)              | L vs RMSF (last 15ns) | L <sup>-1</sup> vs BC | RMSF <sup>-1</sup> (100ns) vs BC | RMSF <sup>-1</sup> (last 15ns) vs BC |
| Hsp72 apo Run1          | 0.52                            | 0.45                  | 0.45                  | 0.18                             | 0.17                                 | 0.48                           | 0.62                  | 0.45                  | 0.45                             | 0.41                                 |
| Hsp72 apo Run2          | 0.53                            | 0.45                  | 0.58                  | 0.19                             | 0.26                                 | 0.67                           | 0.58                  | 0.51                  | 0.21                             | 0.23                                 |
| Hsp72-SANC00132 Run1    | 0.51                            | 0.83                  | 0.58                  | 0.18                             | 0.35                                 | 0.11                           | 0.78                  | 0.56                  | 0.26                             | 0.46                                 |
| Hsp72-SANC00132 Run2    | 0.61                            | 0.74                  | 0.54                  | 0.13                             | 0.31                                 | 0.57                           | 0.78                  | 0.61                  | 0.26                             | 0.26                                 |
| Hsp72 endo-apo Run1     | 0.54                            | 0.85                  | 0.46                  | 0.17                             | 0.33                                 | 0.64                           | 0.79                  | 0.46                  | 0.39                             | 0.34                                 |
| Hsp72 endo-apoRun2      | 0.67                            | 0.83                  | 0.48                  | 0.25                             | 0.31                                 | 0.49                           | 0.72                  | 0.55                  | 0.47                             | 0.29                                 |
| Hsp72 endo-complex Run1 | 0.59                            | 0.39                  | 0.56                  | 0.38                             | 0.28                                 | 0.50                           | 0.14                  | 0.56                  | 0.53                             | 0.00                                 |
| Hsp72 endo-complex Run2 | 0.62                            | 0.61                  | 0.56                  | 0.22                             | 0.34                                 | 0.50                           | 0.68                  | 0.55                  | 0.19                             | 0.34                                 |
| Hsc70 apo Run1          | 0.45                            | 0.84                  | 0.56                  | 0.12                             | 0.43                                 | 0.65                           | 0.88                  | 0.54                  | 0.16                             | 0.43                                 |
| Hsc70 apo Run2          | 0.42                            | 0.41                  | 0.70                  | 0.12                             | 0.23                                 | 0.80                           | 0.72                  | 0.55                  | 0.41                             | 0.37                                 |
| Hsc70-SANC00132 Run1    | 0.88                            | 0.88                  | 0.40                  | 0.34                             | 0.33                                 | 0.54                           | 0.68                  | 0.45                  | 0.40                             | 0.39                                 |
| Hsc70-SANC00132 Run2    | 0.82                            | 0.82                  | 0.43                  | 0.30                             | 0.39                                 | 0.53                           | 0.73                  | 0.54                  | 0.06                             | 0.31                                 |
| Hsc70 endo-apo Run1     | 0.57                            | 0.59                  | 0.55                  | 0.10                             | 0.38                                 | 0.74                           | 0.76                  | 0.53                  | 0.24                             | 0.29                                 |
| Hsc70 endo-apo Run2     | 0.68                            | 0.76                  | 0.42                  | 0.27                             | 0.29                                 | 0.85                           | 0.90                  | 0.52                  | 0.50                             | 0.41                                 |
| Hsc70 endo-complex Run1 | 0.45                            | 0.64                  | 0.54                  | 0.11                             | 0.27                                 | 0.73                           | 0.80                  | 0.51                  | 0.35                             | 0.24                                 |
| Hsc70 endo-complex Run2 | 0.50                            | 0.59                  | 0.62                  | 0.08                             | 0.38                                 | 0.31                           | 0.53                  | 0.46                  | 0.13                             | 0.36                                 |

**Table S10: Tabulated summary of Pearson's correlation coefficient values calculated domain-wise.** The following values were recorded on average: **NBD:** Average L vs RMSF (100ns):  $r = 0.59$ , L vs RMSF (last 15ns):  $r = 0.67$ , L<sup>-1</sup> vs BC:  $r = 0.53$ , RMSF<sup>-1</sup> (100ns) vs BC:  $r = 0.20$ , RMSF<sup>-1</sup> (last 15ns) vs BC:  $r = 0.32$ . **SBD:** Average L vs RMSF (100ns):  $r = 0.57$ , L vs RMSF (last 15ns):  $r = 0.69$ , L<sup>-1</sup> vs BC:  $r = 0.52$ , RMSF<sup>-1</sup> (100ns) vs BC:  $r = 0.31$ , RMSF<sup>-1</sup> (last 15ns) vs BC:  $r = 0.32$ .

**Interactions**

- Conventional Hydrogen Bond
- Carbon-Hydrogen Bond
- Pi-Cation
- Allyl
- Pi-Alkyl



A

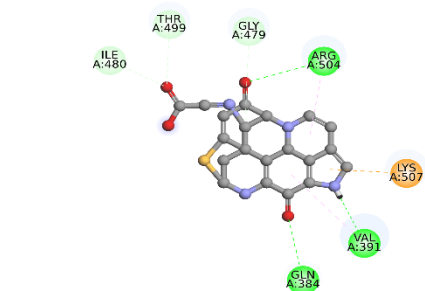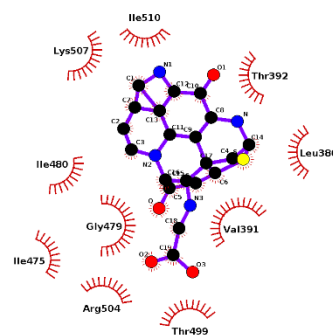

B

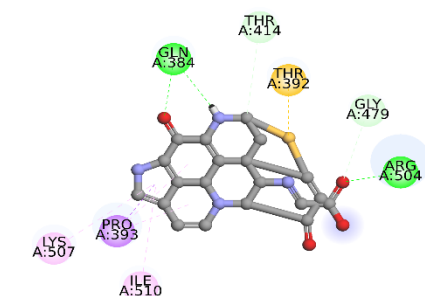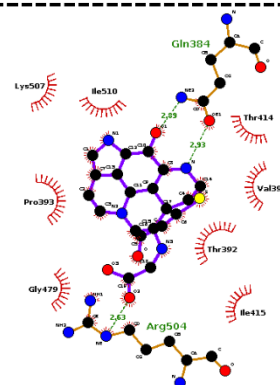

C

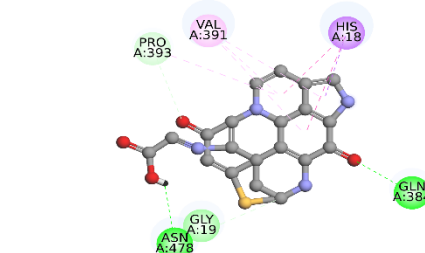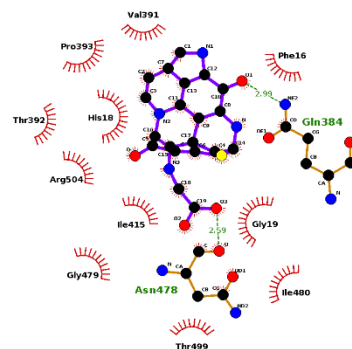

D

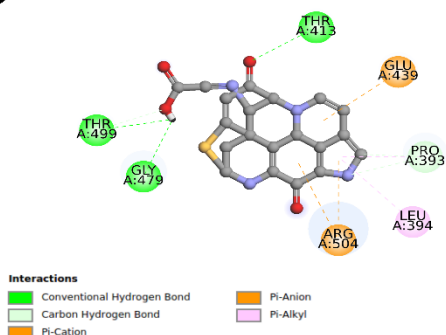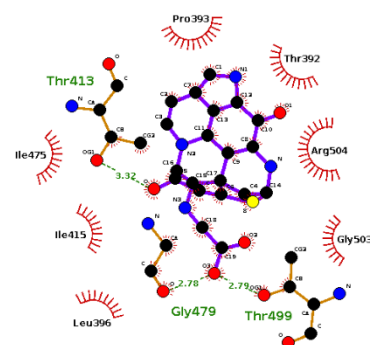

118

119 **Figure S11: Post MD simulation results. Hsc70-SANC00132 molecular interactions**  
 120 **visualised by Discovery studio and LigPlot+.** (A) Hsc70-SANC00132 complex run1, (B)  
 121 Hsc70-SANC00132 complex run2, (C) Hsc70 endo-complex run1, (D) Hsc70 endo-complex  
 122 run2.

123 **Table S11: Tabulated summary of Hsp72 and Hsc70 residues interacting with SANC00132.**  
124 Residues matching putative allosteric hotspots identified from BC, L and DnaK were noted.  
125 Equivalent amino acid numbering based on the full-length protein sequence was also noted.

126

| Protein | Interacting residues                                                                             | Putative allosteric residue match (L)<br>Yes = match<br>No = no match | Putative allosteric residue match (BC)<br>Yes = match<br>No = no match | Corresponding putative allosteric residue match (in DnaK)                                                       | Full-length sequence equivalent                                                                  |
|---------|--------------------------------------------------------------------------------------------------|-----------------------------------------------------------------------|------------------------------------------------------------------------|-----------------------------------------------------------------------------------------------------------------|--------------------------------------------------------------------------------------------------|
| Hsp72   | ALA392<br>PRO393<br>LEU394<br>LEU396<br>ILE409<br>LYS410<br>SER413<br>ILE415<br>ILE475<br>ARG504 | -<br>-<br>-<br>-<br>-<br>-<br>-<br>-<br>-<br>Yes                      | Yes<br>Yes<br>-<br>-<br>-<br>-<br>-<br>-<br>-<br>-                     | THR395 [1]<br>PRO396 [2]<br>LEU397 [2,3]<br>LEU393 [2]<br>ILE412 [2]<br>ALA413 [2]<br>-<br>-<br>ILE478 [2]<br>- | ALA397<br>PRO398<br>LEU399<br>LEU401<br>ILE414<br>LYS415<br>SER418<br>ILE420<br>ILE480<br>ARG509 |
| Hsc70   | GLN384<br>VAL391<br>THR392<br>PRO393<br>ILE415<br>GLY479<br>ILE480<br>THR499<br>ARG504           | Yes<br>-<br>-<br>-<br>-<br>Yes<br>Yes<br>-<br>-                       | Yes<br>-<br>-<br>-<br>Yes<br>Yes<br>-<br>-<br>-                        | -<br>VAL394 [1,3]<br>-<br>PRO396 [2]<br>-<br>-<br>-<br>THR502 [2]<br>-                                          | GLN389<br>VAL396<br>THR397<br>PRO398<br>ILE420<br>GLY484<br>ILE485<br>THR504<br>ARG504           |

127



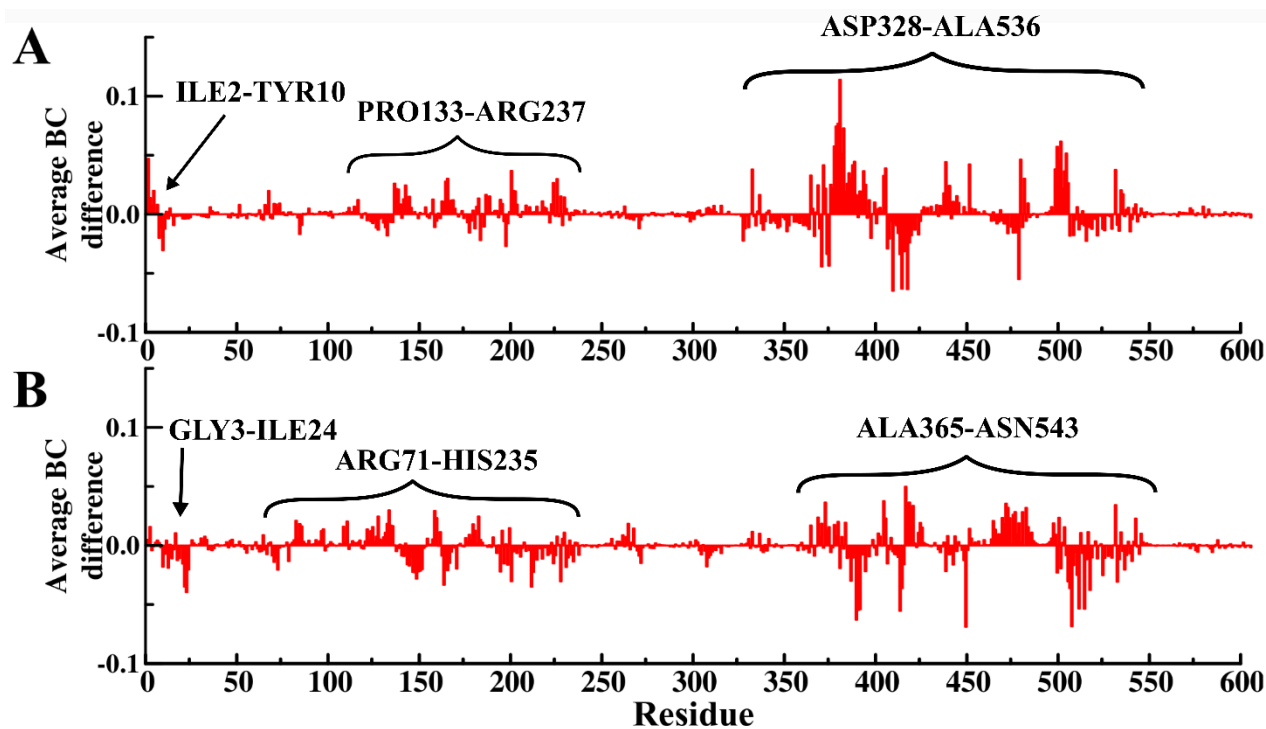

**Figure S12: Bar plots displaying protein regions that yielded significant changes in average betweenness centrality values because of ligand binding.** Values were obtained by calculating SANC00132-free less SANC00132-bound residue centrality on average. A: Hsp72, B: Hsc70.

**Table S12: Tabulated results of residues showing significant changes in average betweenness centrality.** Residue numbering is according to *E. coli* DnaK sequence (UniProtKB ID: P0A6Y8). Residues were identified using cutoff values of twice the standard deviation.

| Protein | Change                                            | Residues                                                                                                                                                                                                                     |
|---------|---------------------------------------------------|------------------------------------------------------------------------------------------------------------------------------------------------------------------------------------------------------------------------------|
| Hsp72   | Positive change<br>(Decreased residue centrality) | ILE2, ARG166, ALA365, ALA372, ASP378, LYS379, SER380, GLU381, ASN382, VAL383, LEU386, LEU387, LEU388, LEU389, LEU394, MET405, THR406, GLU439, GLY452, ILE480, ASN482, THR499, ASN500, ASP501, LYS502, ARG504, LEU505, SER532 |
|         | Negative change<br>(Increased residue centrality) | TYR10, GLN371, ILE374, LEU375, LYS410, THR414, ILE415, PRO416, LYS418, GLY479                                                                                                                                                |
| Hsc70   | Positive change<br>(Decreased residue centrality) | VAL134, ILE159, ALA373, MET405, THR417, GLN419, GLN421, THR472, PHE473, ASP476, ALA477, LEU481, VAL483, SER532                                                                                                               |
|         | Negative change<br>(Increased residue centrality) | GLU22, ILE23, GLN149, VAL164, ASP201, PHE212, PHE228, LEU387, ASP390, VAL391, THR392, THR414, ILE415, LEU450, SER506, LYS507, GLU508, ARG512, GLN515, GLU518, SER533                                                         |

139 **Video S1: An accelerated video of 100ns simulation of Hsp72 apo (run1):** The protein is  
140 represented as a tube.

141 **Video S2: An accelerated video of 100ns simulation of Hsp72-SANC00132 complex (run1):**  
142 The protein is represented as a tube, whereas SANC00132 is depicted in licorice representation.

143 **Video S3: An accelerated video of 100ns simulation of Hsp72 endo-apo run1 (run1):** The  
144 protein is represented as a tube, whereas ADP (red) and peptide substrate (green) are shown by  
145 licorice representation.

146 **Video S4: An accelerated video of 100ns simulation of Hsp72 endo-complex (run2):** The  
147 protein is represented as a tube, whereas ADP (red), SANC00132 (blue), and peptide substrate  
148 (green) are shown by licorice representation.

149

150    **REFERENCE**

- 151    1.    English, C.A.; Sherman, W.; Meng, W.; Gierasch, L.M. The Hsp70 interdomain linker is a  
152        dynamic switch that enables allosteric communication between two structured domains. *J.*  
153        *Biol. Chem.* **2017**, 292, 14765–14774, doi:10.1074/jbc.M117.789313.
- 154    2.    Penkler, D.; Sensoy, Ö.; Atilgan, C.; Tastan Bishop, Ö. Perturbation-Response Scanning  
155        Reveals Key Residues for Allosteric Control in Hsp70. *J. Chem. Inf. Model.* **2017**, 57,  
156        1359–1374, doi:10.1021/acs.jcim.6b00775.
- 157    3.    Qi, R.; Sarbeng, E.B.; Liu, Q.; Le, K.Q.; Xu, X.; Xu, H.; Yang, J.; Wong, J.L.; Vorvis, C.;  
158        Hendrickson, W.A.; et al. Allosteric opening of the polypeptide-binding site when an  
159        Hsp70 binds ATP. *Nat. Struct. Mol. Biol.* **2013**, 20, 900–7, doi:10.1038/nsmb.2583.

160
